# Supplementary material for: Graphene–carbon 2D heterostructures with hierarchically-porous P,N-doped layered architecture for capacitive deionization
Source: Royal Society of Chemistry journal article supplement (doi:10.1039/d1sc00915j), 2021-01-01
Supplement: d1sc00915j1.pdf [file d1sc00915j1.pdf]

## Experimental section

### Materials

Graphite powder,  $\text{KMnO}_4$ ,  $\text{H}_2\text{SO}_4$  and  $\text{HNO}_3$ , poly(vinylidene fluoride) (PVDF), N-methyl-2-pyrrolidinone (NMP) were purchased from Wako Pure Chemical Industry.  $\text{Zn}(\text{NO}_3)_2 \cdot 6\text{H}_2\text{O}$ , 2-methylimidazole (2-MeIM), and phytic acid (PA) solution 50 % (w/w) in  $\text{H}_2\text{O}$  were purchased from Sigma-Aldrich. All chemicals were used as received without further purification.

### Preparation of graphene oxide (GO)

In brief, graphite powder was added to a solution of concentrated  $\text{HNO}_3$  and  $\text{H}_2\text{SO}_4$  (1:2 v/v) and maintained at 80 °C for 5 h. The mixture was then allowed to cool to room temperature, deionized (DI) water was added, and the mixture allowed to stand overnight. The reaction vessel was then placed in an ice bath,  $\text{KMnO}_4$  was slowly added. Subsequently, the mixture was allowed to stand with stirring for 2 h. After dilution with DI water, 30%  $\text{H}_2\text{O}_2$  was added to the mixture, and the colour of the mixture changed to brilliant yellow, accompanied by bubbling. The mixture was then filtered and the solid washed with aqueous HCl solution (1:10 v/v), DI, and ethanol. Finally, GO was obtained by freeze drying.

### Preparation of ZIF-8/GO

Briefly,  $\text{Zn}(\text{NO}_3)_2 \cdot 6\text{H}_2\text{O}$  (0.366 g) and 2-MeIM (0.811 g) were dissolved in methanol (12 mL and 20 mL, resp.). The methanolic  $\text{Zn}(\text{NO}_3)_2$  solution (12 mL) was then added to the 2-MeIM solution to obtain a clear solution. GO solution (1 mg  $\text{mL}^{-1}$  in water, 8 mL) was immediately added to the  $\text{Zn}(\text{NO}_3)_2$ /2-MeIM mixed solution. After stirring for 20 min, the gray precipitate was collected by centrifugation (8000 rpm for 5 min) and was washed three times with methanol. Zeolitic imidazolate framework-8 ZIF-8/GO was obtained after freeze-drying.

## **Preparation of NC/rGO**

ZIF-8/GO nanosheets were converted to NC/rGO nanosheets by carbonization at 950 °C for 2 h under a N<sub>2</sub> atmosphere. The ramping rate was 1 °C min<sup>-1</sup> in the first stage (below 350 °C) and increased to 5 °C min<sup>-1</sup> in the second stage (350 to 950 °C). For comparison, ZIF-8 was obtained without adding the GO solution and employed as the precursor to NC by direct carbonization with the same process.

## **Preparation of porous NPC/rGO**

NPC/rGO nanosheets were prepared by post-activation with PA. In a typical activation process, NC/rGO (30.0 mg) were dispersed in ethanol (1.5 mL) containing PA solution (170 µL). The suspension was then transferred to a quartz boat and dried at 60 °C. Subsequently, the quartz boat was placed in a quartz tube and heated under a N<sub>2</sub> atmosphere. The temperature was increased to 350 °C then 550 °C at a ramp rate of 5 °C min<sup>-1</sup>. Each stage was held for 0.5 h. Temperature was then increased to 1000 °C and held for another 2 h.

## **Characterization.**

Crystal identity of the samples was characterized by using powder X-ray diffraction (XRD, Ultima Rint 2000 X-ray diffractometer, RIGAKU, Japan) measurements using Cu K $\alpha$  radiation (40 kV, 40 mA, 2° min<sup>-1</sup> scan rate). Morphologies of the samples were observed by field-emission scanning electron microscopy (FESEM, HITACHI SU8000). Mesoporous structure of the samples was confirmed by transmission electron microscopy (TEM, JEOL JEM-2100). N<sub>2</sub> adsorption-desorption isotherms were obtained by using a Belsorp-max (BEL, Japan) instrument where the specific surface areas and pore size distributions were analyzed by the Brunauer-Emmett-Teller (BET) method and Barrett-Joyner-Halenda (BJH) models, respectively. X-ray photoelectron spectroscopy (XPS, Axis Ultra, Kratos Analytical Ltd) was used to investigate the chemical state of phosphorus and nitrogen in the samples. The Zeta potential measurements were done in aqueous solutions of the samples in function of pH values ranging from 3 to 11 by Zeta sizer Nano-ZS90 (Malvern,

United Kingdom).

### Electrochemical analyses

The electrochemical measurements were performed on CHI 660E electrochemical workstation in a three-electrode system with 1 M NaCl aqueous electrolyte. A platinum (Pt) wire and Hg/HgO were selected as the counter electrode and reference electrode, respectively. Cyclic voltammetry (CV) and gravimetric charge-discharge (GCD) measurements were carried out in the potential range of -0.5 to 0.5 V.

The specific capacitances ( $C$ , F g<sup>-1</sup>) were calculated from the CV curves by using the following equation:

$$C = \int idV / 2\Delta Vmv \quad (1)$$

where  $i$  is the discharge current density (A),  $m$  is the mass of active materials (g),  $\Delta V$  is the voltage window (V),  $v$  is the scan rate (V s<sup>-1</sup>).

### Desalination analysis

Each individual CDI electrode was fabricated by depositing a mixture of the sample, Super-P and PVDF binder with a weight ratio of 8:1:1. The mixture was pressed onto graphite paper (2.5 × 2.5 cm<sup>2</sup>) and dried under reduced pressure at 60 °C for 12 h.

CDI tests were conducted using a batch-mode with continuous recycling system, which consists of a pair of anion- and cation-exchange membranes, a peristaltic pump, a power source, and a tank. The real-time saline concentration variation was monitored and measured by using an ion conductivity meter. The volume of the saline solution was fixed at 30 mL, the flow rate was 30 mL min<sup>-1</sup>, and the operating voltage was 1.2 V.

The salt adsorption capacity ( $\Gamma$ , mg g<sup>-1</sup>) and mean salt adsorption rate ( $MSAR$ , mg g<sup>-1</sup> min<sup>-1</sup>) at  $t$  min were calculated as follows:

$$\Gamma = (C_0 - C_t) \times V/m \quad (2)$$

$$MSAR = \Gamma/t \quad (3)$$

where  $C_0$  and  $C_t$  represent the concentrations of NaCl at the initial stage and  $t$  min, respectively ( $\text{mg L}^{-1}$ );  $V$  is the volume of the NaCl solution (L); and  $m$  represents the total mass of the electrode materials (g).

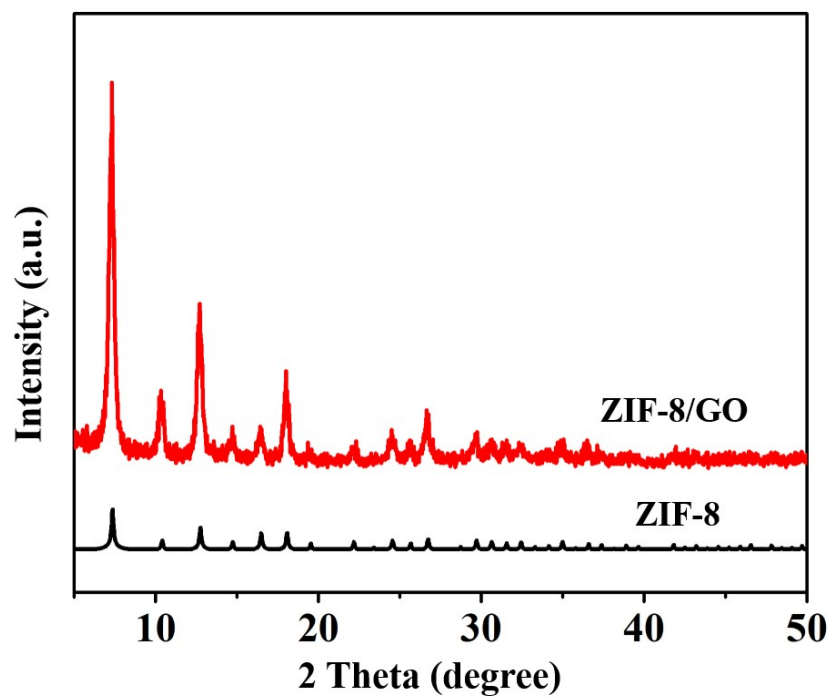

**Fig. S1** XRD patterns of ZIF-8 and ZIF-8/GO.

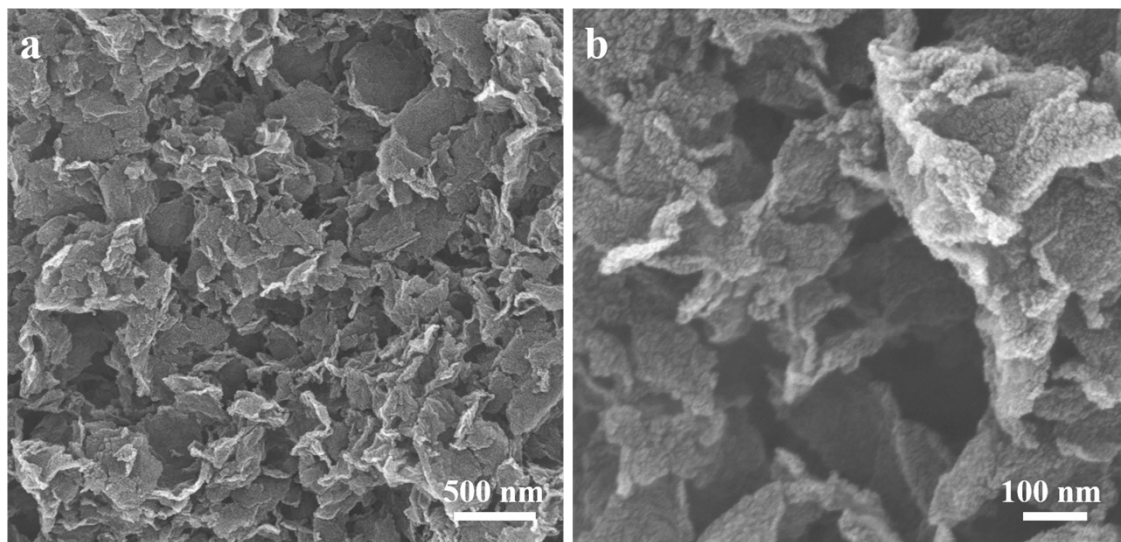

**Fig. S2** (a) Low-resolution and (b) high-resolution SEM images of NC/rGO.

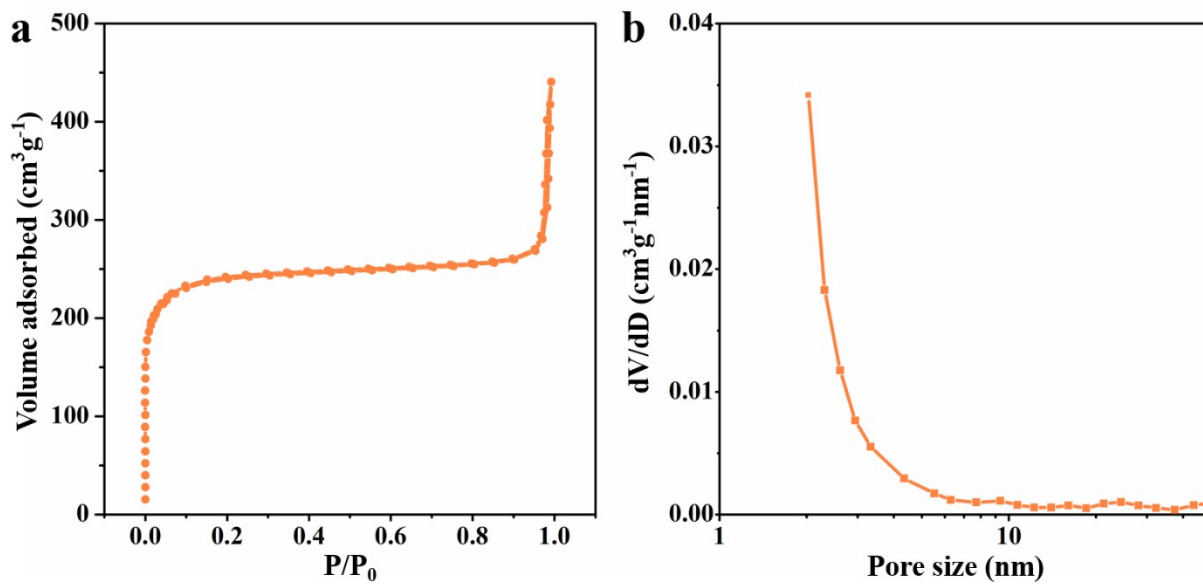

**Fig. S3** (a)  $N_2$  adsorption-desorption isotherms and (b) pore size distribution profiles of NC.

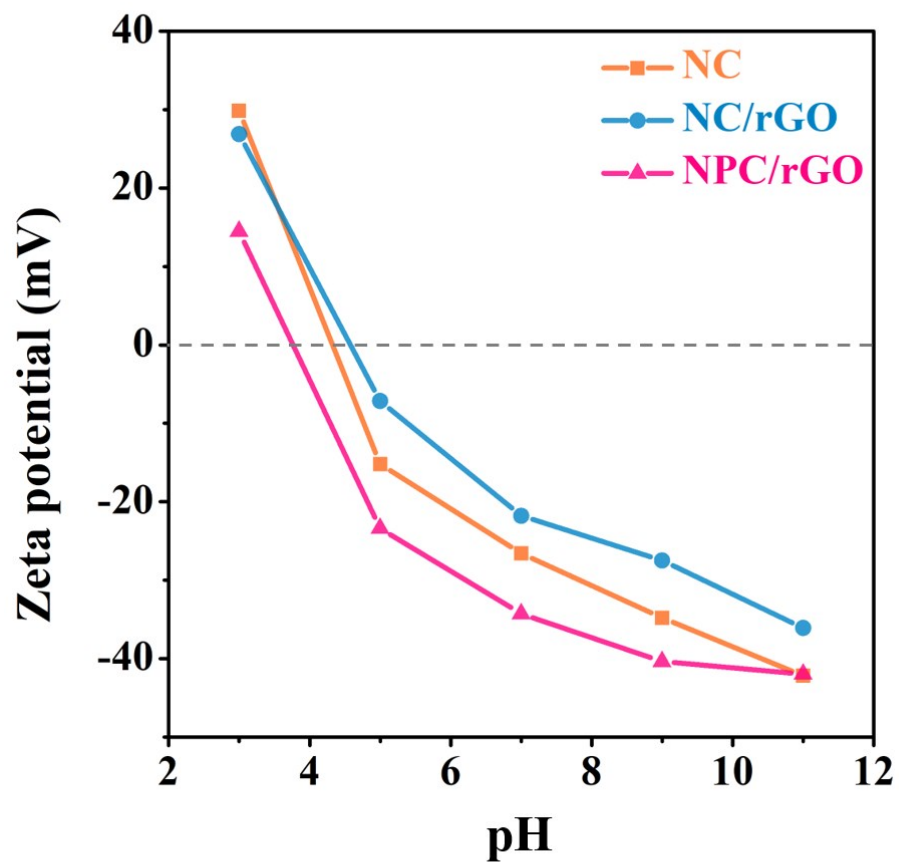

**Fig. S4** Zeta potential curves of NC, NC/rGO and NPC/rGO in NaCl solution under varying pH.



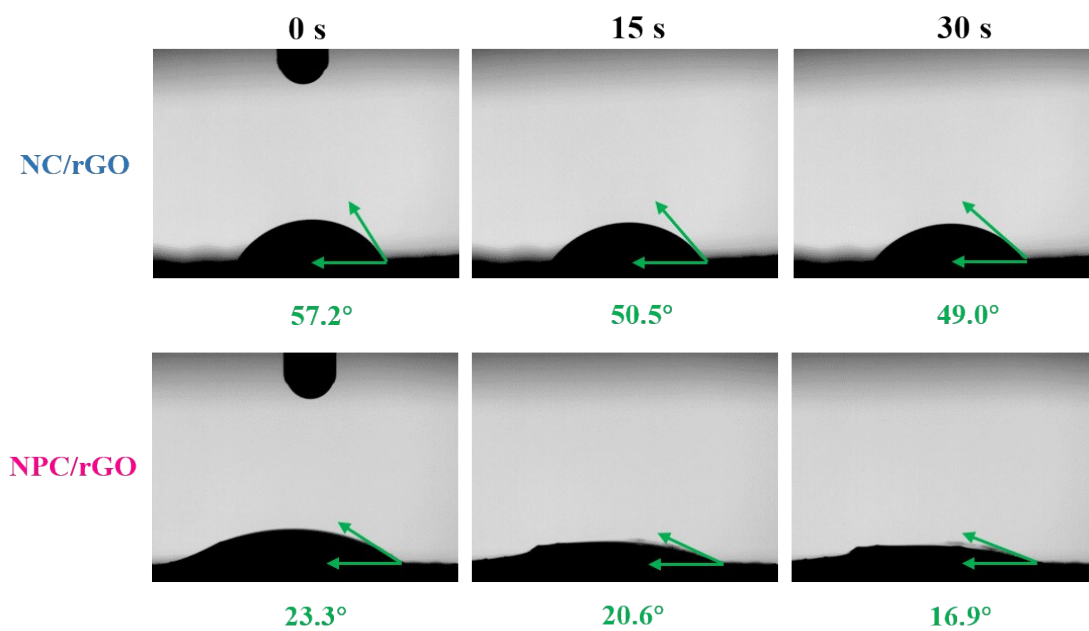

**Fig. S5** Water contact angles of NC/rGO and NPC/rGO electrodes.

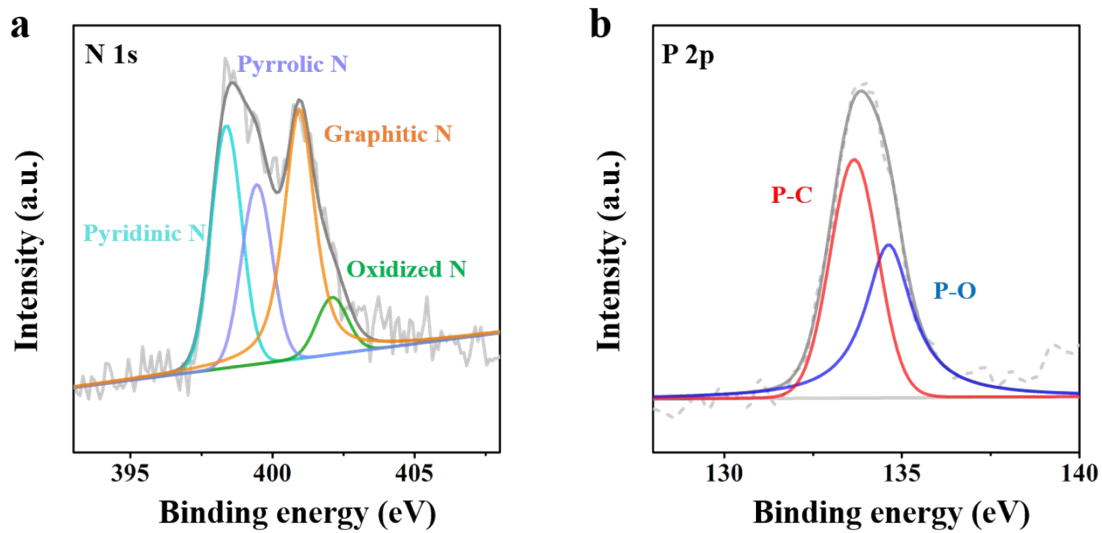

**Fig. S6** (a) N 1s and (b) P 2p spectra of NPC/rGO after 50 cycles.

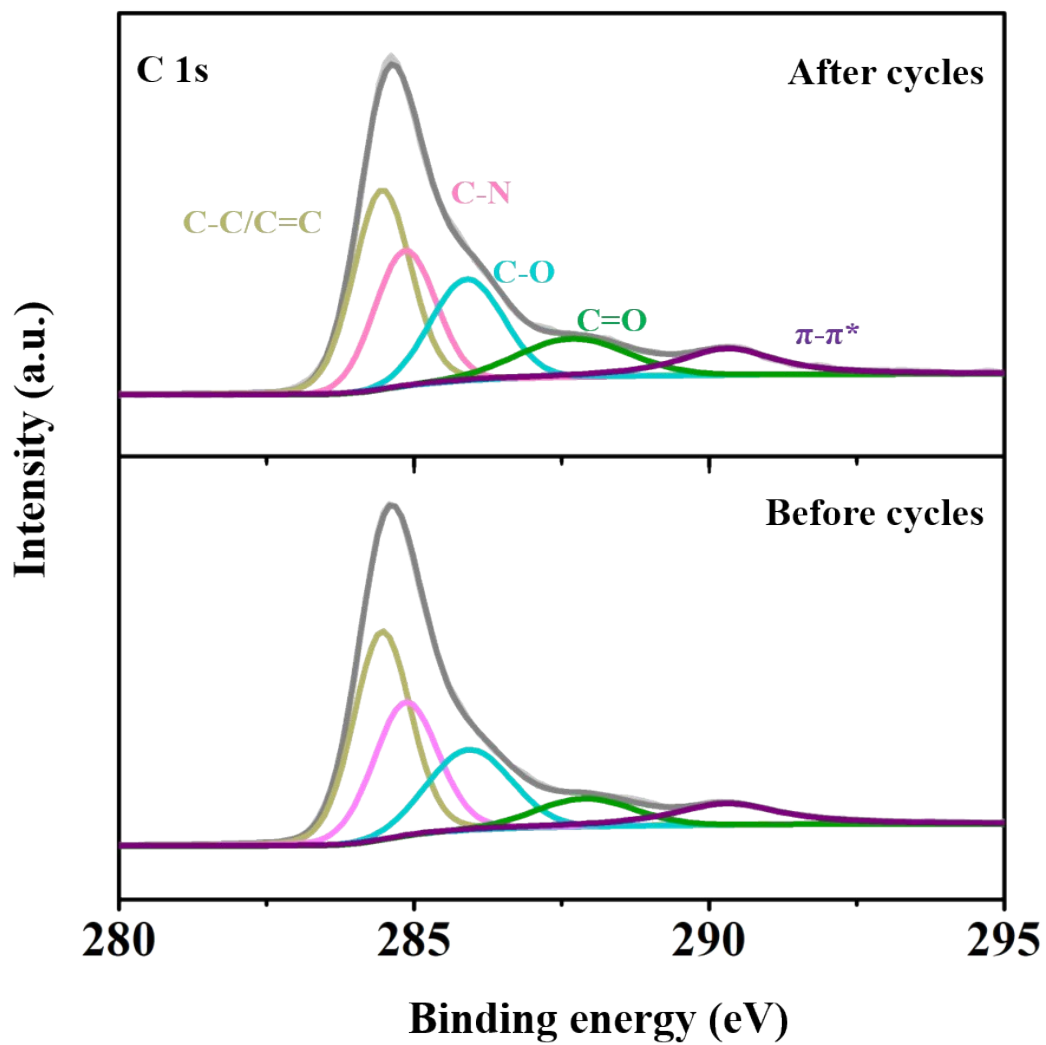

Fig. S7 C 1s spectra of NPC/rGO before and after 50 cycles.

**Table S1.** SSAs and pore volumes of NC, NC/rGO and NPC/rGO

| <b>Sample</b> | <b>SSA (m<sup>2</sup> g<sup>-1</sup>)</b> | <b>Pore volume (cm<sup>3</sup> g<sup>-1</sup>)</b> |
|---------------|-------------------------------------------|----------------------------------------------------|
| NC            | 889                                       | 0.42                                               |
| NC/rGO        | 1019                                      | 3.29                                               |
| NPC/rGO       | 1336                                      | 3.09                                               |

**Table S2.** Performance comparisons of NPC/rGO and other carbon materials

| Sample         | SSA (m <sup>2</sup> g <sup>-1</sup> ) | Voltage (V) | SAC (mg g <sup>-1</sup> ) | Ref. |
|----------------|---------------------------------------|-------------|---------------------------|------|
| P-60           | 1260                                  | 1.5         | 5.28                      | S1   |
| Filtrisorb 400 | 964                                   | 1.0         | 13.03                     | S2   |
| AC-1-2.0       | 2105                                  | 1.0         | 9.72                      | S3   |
| C5A85K4        | 3649                                  | 1.2         | 22.20                     | S4   |
| HPC            | 609                                   | 1.2         | 10.27                     | S5   |
| CCS            | 2680                                  | 1.2         | 16.10                     | S6   |
| 3DHCA          | 2061                                  | 1.2         | 17.83                     | S7   |
| PCNSs          | 2853                                  | 1.1         | 15.60                     | S8   |
| NPC            | 1036.2                                | 1.2         | 15.50                     | S9   |
| SBB-CO2-30     | 1019                                  | 1.2         | 28.90                     | S10  |
| CTS-AC         | 2727                                  | 1.2         | 14.12                     | S11  |
| PCS1000        | 1321                                  | 1.6         | 5.81                      | S12  |
| NPCSs1000      | 1640                                  | 1.2         | 14.91                     | S13  |
| N-PHCS         | 512                                   | 1.4         | 12.95                     | S14  |
| hCSs-800       | 1529                                  | 1.2         | 15.80                     | S15  |
| PCSs-800       | 485.6                                 | 1.2         | 18.50                     | S16  |
| CHS-1          | 809.91                                | 1.6         | 18.88                     | S17  |
| N-HMCSs        | 1099                                  | 1.6         | 16.60                     | S18  |
| OMC            | 844                                   | 1.2         | 0.68                      | S19  |
| NMCs           | 842.3                                 | 1.2         | 20.63                     | S20  |
| NOMC           | 459.32                                | 1.6         | 26.20                     | S21  |
| OMC-O          | 1481                                  | 1.2         | 9.80                      | S22  |
| o-OMCs-1000    | 780.3                                 | 1.2         | 14.58                     | S23  |
| OMC-S          | 1491                                  | 1.2         | 0.93                      | S24  |
| ACk2           | 1968                                  | 1.6         | 11.70                     | S25  |
| N-HMCS/HGH     | 337.7                                 | 1.4         | 37.20                     | S26  |
| GSSNA-11       | 664                                   | 1.2         | 22.09                     | S27  |

|                    |             |            |              |                  |
|--------------------|-------------|------------|--------------|------------------|
| CSG                | 711.9       | 1.5        | 9.60         | S28              |
| GE/MC              | 685.2       | 2.0        | 0.73         | S29              |
| MC                 | 1700        | 1.2        | 3.50         | S30              |
| Activated graphene | 3513        | 2.0        | 11.86        | S31              |
| G@MC-O-thin        | 1270        | 1.2        | 24.30        | S32              |
| AGE-30             | 898         | 1.2        | 6.26         | S33              |
| RGO/AC             | 779         | 1.2        | 2.94         | S34              |
| GTAC               | 426.56      | 1.2        | 10.94        | S35              |
| GS                 | 356.0       | 1.2        | 14.90        | S36              |
| mGE                | 474.0       | 1.2        | 14.20        | S37              |
| HGF                | 124         | 2.0        | 29.60        | S38              |
| EPD-CNTs           | 82          | 1.2        | 2.33         | S39              |
| CNTs/CNFs          | 211         | 1.2        | 1.61         | S40              |
| MWCNT/PVA          | 208         | 1.2        | 13.07        | S41              |
| nit-CNTs           | 200.9       | 1.2        | 17.18        | S42              |
| OMC/CNT            | 620.9       | 1.2        | 0.63         | S43              |
| ZFCarbon           | 2060        | 1.2        | 8.10         | S44              |
| e-CNF-PCP          | 1450.6      | 1.2        | 12.56        | S45              |
| PC-900             | 1563.09     | 1.2        | 9.39         | S46              |
| PC-900             | 1911        | 1.2        | 10.90        | S47              |
| NC-800             | 798         | 1.2        | 8.52         | S48              |
| PCP1200            | 1187.8      | 1.2        | 13.86        | S49              |
| ZIF-8@PZS-C        | 929         | 1.2        | 22.19        | S50              |
| aG10P              | 1067        | 1.2        | 36.10        | S51              |
| <b>NPC/rGO</b>     | <b>1336</b> | <b>1.2</b> | <b>39.34</b> | <b>This work</b> |

---

## References

- S1. Y.-J. Kim and J.-H. Choi, *Sep. Purif. Technol.*, 2010, **71**, 70-75.
- S2. C.-H. Hou and C.-Y. Huang, *Desalination*, 2013, **314**, 124-129.
- S3. C.-L. Yeh, H.-C. Hsi, K.-C. Li and C.-H. Hou, *Desalination*, 2015, **367**, 60-68.
- S4. R. L. Zornitta, K. M. Barcelos, F. G. E. Nogueira and L. A. M. Ruotolo, *Carbon*, 2020, **156**, 346-358.
- S5. Y. Li, I. Hussain, J. Qi, C. Liu, J. Li, J. Shen, X. Sun, W. Han and L. Wang, *Sep. Purif. Technol.*, 2016, **165**, 190-198.
- S6. G.-X. Li, P.-X. Hou, S.-Y. Zhao, C. Liu and H.-M. Cheng, *Carbon*, 2016, **101**, 1-8.
- S7. S. Zhao, T. Yan, H. Wang, J. Zhang, L. Shi and D. Zhang, *ACS Appl. Mater. Interfaces*, 2016, **8**, 18027-18035.
- S8. T. Wu, G. Wang, Q. Dong, F. Zhan, X. Zhang, S. Li, H. Qiao and J. Qiu, *Environ. Sci. Technol.*, 2017, **51**, 9244-9251.
- S9. C. Zhao, G. Liu, N. Sun, X. Zhang, G. Wang, Y. Zhang, H. Zhang and H. Zhao, *Chem. Eng. J.*, 2018, **334**, 1270-1280.
- S10. Y.-H. Tang, S.-H. Liu and D. C. W. Tsang, *J. Hazard. Mater.*, 2020, **383**, 121192.
- S11. Q. Wu, D. Liang, X. Ma, S. Lu and Y. Xiang, *RSC Adv.*, 2019, **9**, 26676-26684.
- S12. Y. Liu, L. Pan, T. Chen, X. Xu, T. Lu, Z. Sun and D. H. C. Chua, *Electrochim. Acta*, 2015, **151**, 489-496.
- S13. Y. Liu, T. Chen, T. Lu, Z. Sun, D. H. C. Chua and L. Pan, *Electrochim. Acta*, 2015, **158**, 403-409.
- S14. S. Zhao, T. Yan, H. Wang, G. Chen, L. Huang, J. Zhang, L. Shi and D. Zhang, *Appl. Surf. Sci.*, 2016, **369**, 460-469.
- S15. X. Xu, H. Tang, M. Wang, Y. Liu, Y. Li, T. Lu and L. Pan, *J. Mater. Chem. A*, 2016, **4**, 16094-16100.
- S16. Y. Li, X. Xu, S. Hou, J. Ma, T. Lu, J. Wang, Y. Yao and L. Pan, *Chem. Commun.*, 2018, **54**, 14009-14012.
- S17. Z. Y. Leong and H. Y. Yang, *RSC Adv.*, 2016, **6**, 53542-53549.
- S18. Y. Li, J. Qi, J. Li, J. Shen, Y. Liu, X. Sun, J. Shen, W. Han and L. Wang, *ACS Sustain. Chem. Eng.*, 2017, **5**, 6635-6644.
- S19. L. Zou, L. Li, H. Song and G. Morris, *Water Res.*, 2008, **42**, 2340-2348.
- S20. X. Xu, A. Enaiet Allah, C. Wang, H. Tan, A. A. Farghali, M. Hamdy Khedr, V. Malgras, T. Yang and Y. Yamauchi, *Chem. Eng. J.*, 2019, **362**, 887-896.
- S21. S. Tian, J. Wu, X. Zhang, K. Ostrikov and Z. Zhang, *Chem. Eng. J.*, 2020, **380**, 122514.
- S22. F. Duan, X. Du, Y. Li, H. Cao and Y. Zhang, *Desalination*, 2015, **376**, 17-24.
- S23. X. Xu, H. Tan, Z. Wang, C. Wang, L. Pan, Y. V. Kaneti, T. Yang and Y. Yamauchi, *Environ. Sci. Nano*, 2019, **6**, 981-989.
- S24. L. Li, L. Zou, H. Song and G. Morris, *Carbon*, 2009, **47**, 775-781.
- S25. G. Wang, B. Qian, Q. Dong, J. Yang, Z. Zhao and J. Qiu, *Sep. Purif. Technol.*, 2013, **103**, 216-221.
- S26. M. Mi, X. Liu, W. Kong, Y. Ge, W. Dang and J. Hu, *Desalination*, 2019, **464**, 18-24.
- S27. Z. U. Khan, T. Yan, L. Shi and D. Zhang, *Environ. Sci. Nano*, 2018, **5**, 980-991.
- S28. L. Chang and Y. Hang Hu, *J. Colloid Interf. Sci.*, 2019, **538**, 420-425.
- S29. D. Zhang, X. Wen, L. Shi, T. Yan and J. Zhang, *Nanoscale*, 2012, **4**, 5440-5446.
- S30. C. Tsouris, R. Mayes, J. Kiggans, K. Sharma, S. Yiacoymi, D. DePaoli and S. Dai, *Environ. Sci. Technol.*, 2011, **45**, 10243-10249.
- S31. Z. Li, B. Song, Z. Wu, Z. Lin, Y. Yao, K.-S. Moon and C. P. Wong, *Nano Energy*, 2015, **11**, 711-718.
- S32. O. Noonan, Y. Liu, X. Huang and C. Yu, *J. Mater. Chem. A*, 2018, **6**, 14272-14280.
- S33. Y. Zhang, L. Chen, S. Mao, Z. Sun, Y. Song and R. Zhao, *J. Colloid Interface Sci.*, 2019, **536**, 252-260.
- S34. H. Li, L. Pan, C. Nie, Y. Liu and Z. Sun, *J. Mater. Chem.*, 2012, **22**, 15556-15561.

- S35. G. Zhu, W. Wang, X. Li, J. Zhu, H. Wang and L. Zhang, *RSC Adv.*, 2016, **6**, 5817-5823.
- S36. X. Xu, L. Pan, Y. Liu, T. Lu, Z. Sun and D. H. C. Chua, *Sci. Rep.*, 2015, **5**, 8458.
- S37. X. Xu, Y. Liu, M. Wang, X. Yang, C. Zhu, T. Lu, R. Zhao and L. Pan, *Electrochim. Acta*, 2016, **188**, 406-413.
- S38. J. Li, B. Ji, R. Jiang, P. Zhang, N. Chen, G. Zhang and L. Qu, *Carbon*, 2018, **129**, 95-103.
- S39. C. Nie, L. Pan, H. Li, T. Chen, T. Lu and Z. Sun, *J. Electroanal. Chem.*, 2012, **666**, 85-88.
- S40. H. Li, L. Pan, Y. Zhang, L. Zou, C. Sun, Y. Zhan and Z. Sun, *Chem. Phys. Lett.*, 2010, **485**, 161-166.
- S41. C.-H. Hou, N.-L. Liu, H.-L. Hsu and W. Den, *Sep. Purif. Technol.*, 2014, **130**, 7-14.
- S42. P. Shi, C. Wang, J. Sun, P. Lin, X. Xu and T. Yang, *Sep. Purif. Technol.*, 2020, **235**, 116196.
- S43. Z. Peng, D. Zhang, L. Shi and T. Yan, *J. Mater. Chem.*, 2012, **22**, 6603-6612.
- S44. M. Wang, X. Xu, Y. Liu, Y. Li, T. Lu and L. Pan, *Carbon*, 2016, **108**, 433-439.
- S45. Y. Liu, J. Ma, T. Lu and L. Pan, *Sci. Rep.*, 2016, **6**, 32784.
- S46. L. Chang, J. Li, X. Duan and W. Liu, *Electrochim. Acta*, 2015, **176**, 956-964.
- S47. X. Duan, W. Liu and L. Chang, *J. Taiwan Inst. Chem. E.*, 2016, **62**, 132-139.
- S48. N.-L. Liu, S. Dutta, R. R. Salunkhe, T. Ahamad, S. M. Alshehri, Y. Yamauchi, C.-H. Hou and K. C. W. Wu, *Sci. Rep.*, 2016, **6**, 28847.
- S49. Y. Liu, X. Xu, M. Wang, T. Lu, Z. Sun and L. Pan, *Chem. Commun.*, 2015, **51**, 12020-12023.
- S50. J. Zhang, J. Fang, J. Han, T. Yan, L. Shi and D. Zhang, *J. Mater. Chem. A*, 2018, **6**, 15245-15252.
- S51. Z. Y. Leong, G. Lu and H. Y. Yang, *Desalination*, 2019, **451**, 172-181.
